# Supplementary material for: Development of a new assessment tool for cervical myelopathy using hand-tracking sensor: Part 1: validity and reliability
Source: Springer Nature journal article supplement (doi:10.1007/s00586-017-4948-3), 2017-01-18
Supplement: MOESM2 [file 12007866]

**Development of a new assessment tool for cervical myelopathy using hand tracking sensor – Part 1: validity and reliability**

**Electronic Supplementary Materials:**

**Online Resource 2 – Full extension half-cycle; five positions and four motions**

**
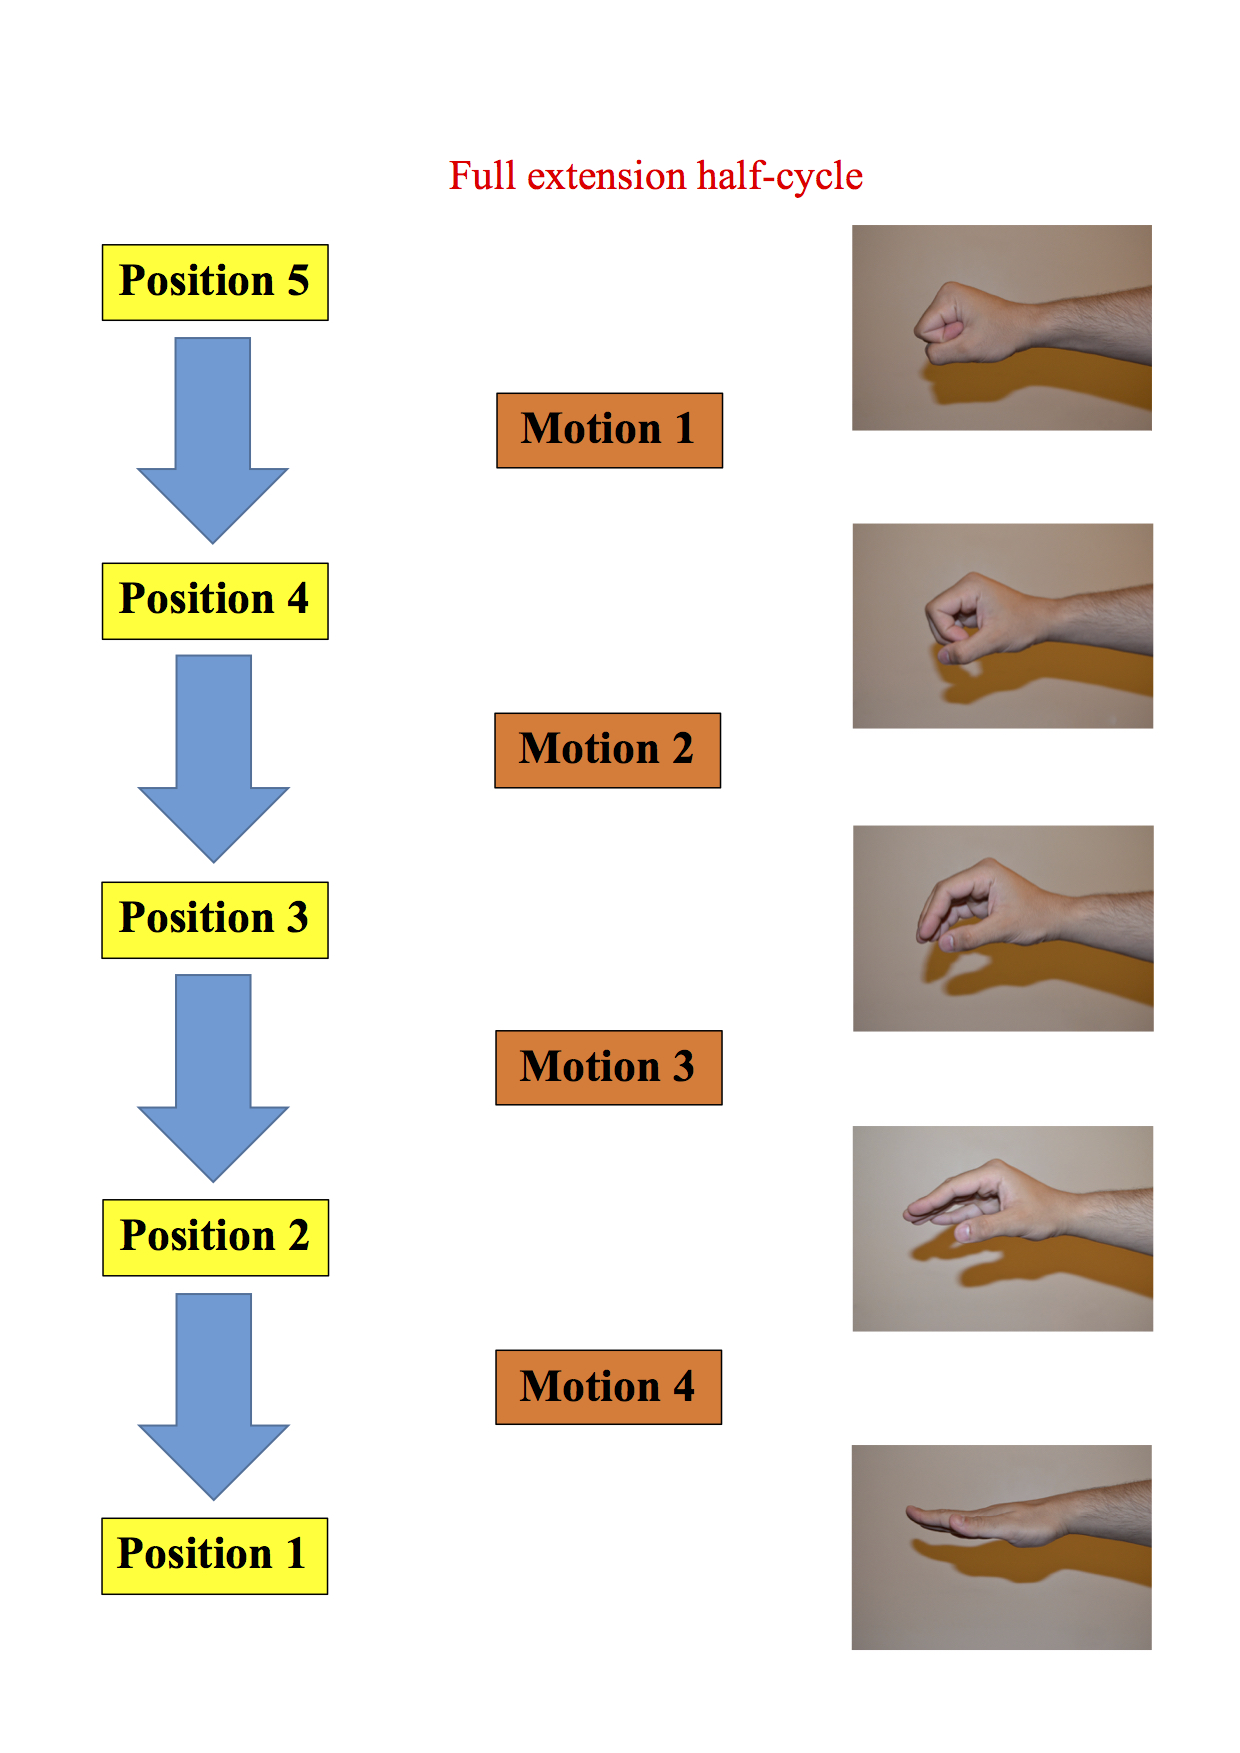
**
